# Supplementary material
Source: publisher figshare collection journal article supplement (https://geolsoc.figshare.com/articles/dataset/_/3452915)
Supplement: Supplementary file 1 [file 1]

Supplementary Appendix 2. Assessment input data for the Main Basin Platform Assessment Unit.

[MMBO, million barrels of oil; BCFG, billion cubic feet of gas; MMBNGL, million barrels of natural-gas liquids; MMBOE, million barrels of oil equivalent; NGL, natural gas liquids; CFG/BO, cubic feet of gas per barrel of oil; BNGL/MMCFG, barrels of natural gas liquids per million cubic feet of gas; BLIQ/MMCFG, barrels of liquids per million cubic feet of gas; AU, assessment unit; TPS, total petroleum system. F75 denotes a 75-percent chance; F25 denotes a 25-percent chance.]

**CIRCUM-ARCTIC RESOURCE ASSESSMENT  
GEOLOGIC DATA FORM FOR CONVENTIONAL ASSESSMENT UNITS (Version 5.1, June 4, 2007)**

**IDENTIFICATION INFORMATION**

|                         |                     |         |           |
|-------------------------|---------------------|---------|-----------|
| Assessment Geologist:   | C.J. Schenk         | Date:   | 27-Feb-08 |
| Region:                 | Former Soviet Union | Number: | 1         |
| Province:               | Timan-Pechora       | Number: | 1008      |
| Total Petroleum System: | Domanik-Paleozoic   | Number: | 100801    |
| Assessment Unit:        | Main Basin Platform | Number: | 10080102  |
| Scenario:               |                     | Number: |           |
| Based on Data as of:    |                     |         |           |
| Notes from Assessor:    |                     |         |           |

**CHARACTERISTICS OF ASSESSMENT UNIT**

Area of assessment unit: 210,000 square kilometers

Minimum assessed accumulation size: 50 MMBOE (grown)

No. of discovered accumulations exceeding minimum size: Oil: 54 Gas: 10

|                           |           |           |
|---------------------------|-----------|-----------|
| <b>Uncertainty Class:</b> | Check One | Number    |
| Producing fields          | <u>X</u>  | <u>64</u> |
| Discoveries               | <u></u>   | <u></u>   |
| Wells                     | <u></u>   | <u></u>   |
| Seismic                   | <u></u>   | <u></u>   |
| No seismic                | <u></u>   | <u></u>   |

Median size (grown) of discovered oil accumulations (MMBO):

|         |           |         |           |         |          |    |
|---------|-----------|---------|-----------|---------|----------|----|
| 1st 3rd | <u>38</u> | 2nd 3rd | <u>17</u> | 3rd 3rd | <u>9</u> | 16 |
|---------|-----------|---------|-----------|---------|----------|----|

Median size (grown) of discovered gas accumulations (BCFG):

|         |           |         |            |         |            |     |
|---------|-----------|---------|------------|---------|------------|-----|
| 1st 3rd | <u>27</u> | 2nd 3rd | <u>268</u> | 3rd 3rd | <u>327</u> | 124 |
|---------|-----------|---------|------------|---------|------------|-----|

**ANALOGS USED IN ESTIMATING INPUT**

| <u>Purpose</u>                    | <u>Analog or Analog Set</u>                      |
|-----------------------------------|--------------------------------------------------|
| 1 <u>Numbers of Accumulations</u> | <u>Compressional</u><br><u>Discovery history</u> |
| 2 <u>Sizes of Accumulations</u>   | <u>Compressional</u><br><u>Discovery history</u> |
| 3 <u>Ancillary Data</u>           | <u>Data from existing fields</u>                 |
| 4 <u>Co-Products</u>              | <u>Data from existing fields</u>                 |

|                             |                               |
|-----------------------------|-------------------------------|
| Assessment Unit (name, no.) | Main Basin Platform, 10080102 |
| Scenario (name, no.)        |                               |

Scenario Probability: Probability of occurrence (0-1.0)

**Assessment-Unit Probabilities:** (Adequacy for at least one undiscovered field of minimum size)

| <u>Attribute</u>                                                      | <u>Probability of occurrence (0-1.0)</u> |
|-----------------------------------------------------------------------|------------------------------------------|
| 1. <b>CHARGE:</b> Adequate petroleum charge:                          | <u>1.0</u>                               |
| 2. <b>ROCKS:</b> Adequate reservoirs, traps, and seals:               | <u>1.0</u>                               |
| 3. <b>TIMING OF GEOLOGIC EVENTS:</b> Favorable timing:                | <u>1.0</u>                               |
| <b>Assessment-Unit GEOLOGIC Probability</b> (Product of 1, 2, and 3): | <u>1.0</u>                               |

### UNDISCOVERED ACCUMULATIONS

**Number of Undiscovered Accumulations:** How many undiscovered accumulations exist that are at least the minimum size?: (uncertainty of fixed but unknown values)

|                      |                                                                |                  |                   |
|----------------------|----------------------------------------------------------------|------------------|-------------------|
| Total Accumulations: | minimum (>0) <u>1</u>                                          | median <u>33</u> | maximum <u>80</u> |
| Oil/Gas Mix:         | minimum (>0) <u>50</u>                                         | mode <u>85</u>   | maximum <u>90</u> |
|                      | X <u>no. of oil accumulations / no. of total accumulations</u> |                  |                   |
|                      | <u>no. of oil accumulations / no. of gas accumulations</u>     |                  |                   |
|                      | <u>no. of gas accumulations / no. of oil accumulations</u>     |                  |                   |
| Oil Accumulations:   | minimum (>0) <u>1</u>                                          | median <u>25</u> | maximum <u>72</u> |
| Gas Accumulations:   | minimum (>0) <u>0</u>                                          | median <u>8</u>  | maximum <u>40</u> |

**Sizes of Undiscovered Accumulations:** What are the sizes (**grown**) of the above accumulations?: (variations in the sizes of undiscovered accumulations)

|                                  |                    |                   |                      |
|----------------------------------|--------------------|-------------------|----------------------|
| Oil in Oil Accumulations (MMBO): | minimum <u>50</u>  | median <u>80</u>  | maximum <u>2,000</u> |
| Gas in Gas Accumulations (BCFG): | minimum <u>300</u> | median <u>480</u> | maximum <u>6,000</u> |

### RATIOS FOR UNDISCOVERED ACCUMULATIONS, TO ASSESS COPRODUCTS

(variations in the properties of undiscovered accumulations)

|                                 |            |              |               |
|---------------------------------|------------|--------------|---------------|
| <u>Oil Accumulations:</u>       | minimum    | median       | maximum       |
| Gas/oil ratio (CFG/BO):         | <u>500</u> | <u>1,000</u> | <u>12,000</u> |
| NGL/gas ratio (BNGL/MMCFG):     | <u>5</u>   | <u>20</u>    | <u>110</u>    |
| <u>Gas Accumulations:</u>       | minimum    | median       | maximum       |
| Liquids/gas ratio (BLIQ/MMCFG): | <u>5</u>   | <u>20</u>    | <u>80</u>     |

|                             |                                      |
|-----------------------------|--------------------------------------|
| Assessment Unit (name, no.) | <u>Main Basin Platform, 10080102</u> |
| Scenario (name, no.)        | <u></u>                              |

### SELECTED ANCILLARY DATA FOR UNDISCOVERED ACCUMULATIONS

(variations in the properties of undiscovered accumulations)

|                                     |             |            |           |
|-------------------------------------|-------------|------------|-----------|
| <u>Oil Accumulations:</u>           | minimum     | median     | maximum   |
| API gravity (degrees):              | <u>20</u>   | <u>35</u>  | <u>55</u> |
| Viscosity (centipoise)              | <u>0.01</u> | <u>22</u>  | <u>30</u> |
| Sulfur content of oil (%):          | <u>0.1</u>  | <u>0.7</u> | <u>2</u>  |
| Depth (m) of water (if applicable): | <u>0</u>    | <u>10</u>  | <u>30</u> |

|                     |              |     |              |     |              |
|---------------------|--------------|-----|--------------|-----|--------------|
|                     | minimum      | F75 | median       | F25 | maximum      |
| Drilling depth (m): | <u>1,200</u> |     | <u>2,500</u> |     | <u>4,500</u> |

|                                     |            |             |            |
|-------------------------------------|------------|-------------|------------|
| <u>Gas Accumulations:</u>           | minimum    | median      | maximum    |
| Inert gas content (%):              | <u>0.5</u> | <u>3</u>    | <u>8</u>   |
| Carbon dioxide content (%):         | <u>0.1</u> | <u>0.6</u>  | <u>4</u>   |
| Hydrogen sulfide content (%):       | <u>0</u>   | <u>0.05</u> | <u>0.2</u> |
| Depth (m) of water (if applicable): | <u>0</u>   | <u>10</u>   | <u>30</u>  |

|                     |              |     |              |     |              |
|---------------------|--------------|-----|--------------|-----|--------------|
|                     | minimum      | F75 | median       | F25 | maximum      |
| Drilling depth (m): | <u>1,200</u> |     | <u>3,000</u> |     | <u>4,500</u> |

|                             |                                      |
|-----------------------------|--------------------------------------|
| Assessment Unit (name, no.) | <u>Main Basin Platform, 10080102</u> |
| Scenario (name, no.)        | <u></u>                              |

### ALLOCATIONS OF POTENTIAL ADDITIONS TO RESERVES TO ARCTIC AREA

#### 1 North of Arctic Circle

50 area % of the AU

|                           |           |                    |
|---------------------------|-----------|--------------------|
| Oil in Oil Accumulations: | <u>50</u> | volume % of the AU |
| Gas in Gas Accumulations: | <u>50</u> | volume % of the AU |

#### 2 South of Arctic Circle

50 area % of the AU

|                           |           |                    |
|---------------------------|-----------|--------------------|
| Oil in Oil Accumulations: | <u>50</u> | volume % of the AU |
| Gas in Gas Accumulations: | <u>50</u> | volume % of the AU |

Assessment Unit (name, no.) Main Basin Platform, 10080102  
Scenario (name, no.) \_\_\_\_\_

#### ALLOCATIONS OF POTENTIAL ADDITIONS TO RESERVES TO COUNTRIES

1 Offshore

14 area % of the AU

Oil in Oil Accumulations: 14 volume % of the AU  
Gas in Gas Accumulations: 14 volume % of the AU

2 Onshore portion of:

Russian Federation

86 area % of the AU

Oil in Oil Accumulations: 86 volume % of the AU  
Gas in Gas Accumulations: 86 volume % of the AU

Assessment Unit (name, no.) Main Basin Platform, 10080102  
Scenario (name, no.) \_\_\_\_\_

#### ALLOCATIONS OF POTENTIAL ADDITIONS TO RESERVES TO PROVINCES

1 ONSHORE portion of:

None

\_\_\_\_\_ area % of the AU

Oil in Oil Accumulations: \_\_\_\_\_ volume % of the AU  
Gas in Gas Accumulations: \_\_\_\_\_ volume % of the AU

OFFSHORE portion of:

None

\_\_\_\_\_ area % of the AU

Oil in Oil Accumulations: \_\_\_\_\_ volume % of the AU  
Gas in Gas Accumulations: \_\_\_\_\_ volume % of the AU
