# Supplementary material
Source: publisher figshare collection journal article supplement (https://geolsoc.figshare.com/articles/dataset/_/3452915)
Supplement: Supplementary file 2 [file 1]

Supplementary Appendix 1. Assessment input data for the Northwest Izhma Depression Assessment Unit.

[MMBO, million barrels of oil; BCFG, billion cubic feet of gas; MMBNGL, million barrels of natural-gas liquids; MMBOE, million barrels of oil equivalent; NGL, natural gas liquids; CFG/BO, cubic feet of gas per barrel of oil; BNGL/MMCFG, barrels of natural gas liquids per million cubic feet of gas; BLIQ/MMCFG, barrels of liquids per million cubic feet of gas; AU, assessment unit; TPS, total petroleum system. F75 denotes a 75-percent chance; F25 denotes a 25-percent chance.]

**CIRCUM-ARCTIC RESOURCE ASSESSMENT  
GEOLOGIC DATA FORM FOR CONVENTIONAL ASSESSMENT UNITS (Version 5.1, June 4, 2007)**

**IDENTIFICATION INFORMATION**

|                         |                             |         |           |
|-------------------------|-----------------------------|---------|-----------|
| Assessment Geologist:   | C.J. Schenk                 | Date:   | 26-Feb-08 |
| Region:                 | Former Soviet Union         | Number: | 1         |
| Province:               | Timan-Pechora               | Number: | 1008      |
| Total Petroleum System: | Domanik-Paleozoic           | Number: | 100801    |
| Assessment Unit:        | Northwest Izhma Depression  | Number: | 10080101  |
| Scenario:               |                             | Number: |           |
| Based on Data as of:    |                             |         |           |
| Notes from Assessor:    | Not quantitatively assessed |         |           |

**CHARACTERISTICS OF ASSESSMENT UNIT**

Area of assessment unit: 81,000 square kilometers

Minimum assessed accumulation size: 50 MMBOE (grown)

No. of discovered accumulations exceeding minimum size: Oil: \_\_\_\_\_ Gas: \_\_\_\_\_

|                           |           |        |
|---------------------------|-----------|--------|
| <b>Uncertainty Class:</b> | Check One | Number |
| Producing fields          | _____     | _____  |
| Discoveries               | _____     | _____  |
| Wells                     | _____     | _____  |
| Seismic                   | _____     | _____  |
| No seismic                | _____     | _____  |

Median size (grown) of discovered oil accumulations (MMBO):

|         |       |         |       |         |       |
|---------|-------|---------|-------|---------|-------|
| 1st 3rd | _____ | 2nd 3rd | _____ | 3rd 3rd | _____ |
|---------|-------|---------|-------|---------|-------|

Median size (grown) of discovered gas accumulations (BCFG):

|         |       |         |       |         |       |
|---------|-------|---------|-------|---------|-------|
| 1st 3rd | _____ | 2nd 3rd | _____ | 3rd 3rd | _____ |
|---------|-------|---------|-------|---------|-------|

**ANALOGS USED IN ESTIMATING INPUT**

| <u>Purpose</u> | <u>Analog or Analog Set</u> |
|----------------|-----------------------------|
| 1 _____        | None                        |
| 2 _____        | _____                       |
| 3 _____        | _____                       |
| 4 _____        | _____                       |

|                             |                                      |
|-----------------------------|--------------------------------------|
| Assessment Unit (name, no.) | Northwest Izhma Depression, 10080101 |
| Scenario (name, no.)        |                                      |

Scenario Probability: Probability of occurrence (0-1.0)

**Assessment-Unit Probabilities:** (Adequacy for at least one undiscovered field of minimum size)

| <u>Attribute</u>                                                      | <u>Probability of occurrence (0-1.0)</u> |
|-----------------------------------------------------------------------|------------------------------------------|
| 1. <b>CHARGE:</b> Adequate petroleum charge:                          | 0.2                                      |
| 2. <b>ROCKS:</b> Adequate reservoirs, traps, and seals:               | 0.5                                      |
| 3. <b>TIMING OF GEOLOGIC EVENTS:</b> Favorable timing:                | 0.2                                      |
| <b>Assessment-Unit GEOLOGIC Probability</b> (Product of 1, 2, and 3): | 0.05                                     |

### UNDISCOVERED ACCUMULATIONS

**Number of Undiscovered Accumulations:** How many undiscovered accumulations exist that are at least the minimum size?: (uncertainty of fixed but unknown values)

|                      |              |                                                       |         |
|----------------------|--------------|-------------------------------------------------------|---------|
| Total Accumulations: | minimum (>0) | median                                                | maximum |
| Oil/Gas Mix:         | minimum (>0) | mode                                                  | maximum |
|                      | x            | no. of oil accumulations / no. of total accumulations |         |
|                      |              | no. of oil accumulations / no. of gas accumulations   |         |
|                      |              | no. of gas accumulations / no. of oil accumulations   |         |
| Oil Accumulations:   | minimum (>0) | median                                                | maximum |
| Gas Accumulations:   | minimum (>0) | median                                                | maximum |

**Sizes of Undiscovered Accumulations:** What are the sizes (**grown**) of the above accumulations?: (variations in the sizes of undiscovered accumulations)

|                                  |         |        |         |
|----------------------------------|---------|--------|---------|
| Oil in Oil Accumulations (MMBO): | minimum | median | maximum |
| Gas in Gas Accumulations (BCFG): | minimum | median | maximum |

### RATIOS FOR UNDISCOVERED ACCUMULATIONS, TO ASSESS COPRODUCTS

(variations in the properties of undiscovered accumulations)

|                                 |         |        |         |
|---------------------------------|---------|--------|---------|
| <u>Oil Accumulations:</u>       | minimum | median | maximum |
| Gas/oil ratio (CFG/BO):         |         |        |         |
| NGL/gas ratio (BNGL/MMCFG):     |         |        |         |
| <u>Gas Accumulations:</u>       | minimum | median | maximum |
| Liquids/gas ratio (BLIQ/MMCFG): |         |        |         |

Assessment Unit (name, no.)  
Scenario (name, no.)

Northwest Izhma Depression, 10080101

**SELECTED ANCILLARY DATA FOR UNDISCOVERED ACCUMULATIONS**

(variations in the properties of undiscovered accumulations)

| <u>Oil Accumulations:</u>           | minimum |  | median |  | maximum |
|-------------------------------------|---------|--|--------|--|---------|
| API gravity (degrees):              | _____   |  | _____  |  | _____   |
| Viscosity (centipoise)              | _____   |  | _____  |  | _____   |
| Sulfur content of oil (%):          | _____   |  | _____  |  | _____   |
| Depth (m) of water (if applicable): | _____   |  | _____  |  | _____   |

|                     | minimum | F75 | median | F25 | maximum |
|---------------------|---------|-----|--------|-----|---------|
| Drilling depth (m): | _____   |     |        |     |         |

| <u>Gas Accumulations:</u>           | minimum |  | median |  | maximum |
|-------------------------------------|---------|--|--------|--|---------|
| Inert gas content (%):              | _____   |  | _____  |  | _____   |
| Carbon dioxide content (%):         | _____   |  | _____  |  | _____   |
| Hydrogen sulfide content (%):       | _____   |  | _____  |  | _____   |
| Depth (m) of water (if applicable): | _____   |  | _____  |  | _____   |

|                     | minimum | F75 | median | F25 | maximum |
|---------------------|---------|-----|--------|-----|---------|
| Drilling depth (m): | _____   |     |        |     |         |
